# Supplementary material for: Formation, structural characteristics and physicochemical properties of beeswax oleogels prepared with tea polyphenol loaded gelators
Source: Royal Society of Chemistry journal article supplement (doi:10.1039/d0fo02772c), 2021-01-01
Supplement: d0fo02772c1.pdf [file d0fo02772c1.pdf]

1 **Supplementary information**

2 **Title**

3 Formation, structural characteristics and physiochemical properties of beeswax oleogel prepared with  
4 tea polyphenols loaded gelator

5 **Name(s) of Author(s)**

6 Junge Shang<sup>ab</sup>, Fang Zhong<sup>ab</sup>, Song Zhu<sup>a</sup>, Dejian Huang<sup>c</sup>, Yue Li<sup>ab\*</sup>

7 **Author Affiliation(s)**

8 <sup>a</sup> State Key Laboratory of Food Science and Technology, Jiangnan University, Wuxi 214122, China

9 <sup>b</sup> School of Food Science and Technology, Jiangnan University, Wuxi 214122, China

10 <sup>c</sup> Department of Food Science and Technology, National University of Singapore, 117542, Singapore

11 \* Corresponding author:

12 Yue Li, State Key Laboratory of Food Science and Technology, School of Food Science and  
13 Technology, Jiangnan University, Wuxi, Jiangsu, 214122, China

14 Email: liyue@jiangnan.edu.cn, Tel: 86-13915335603

15 **Supplementary data**

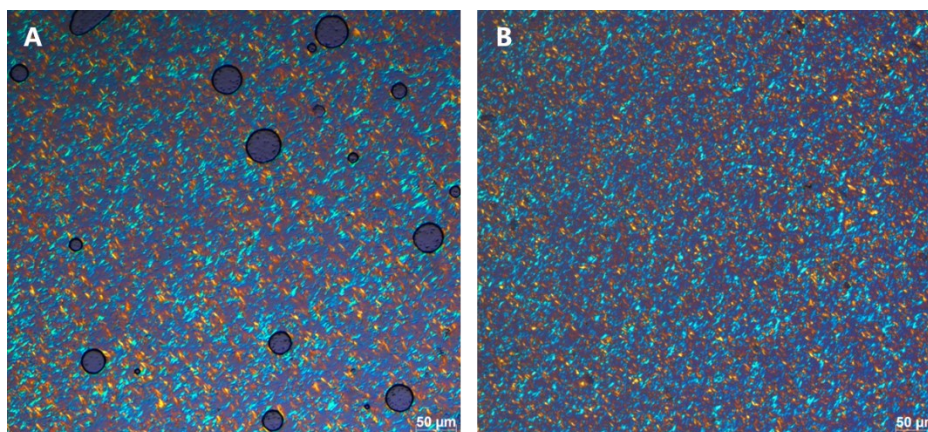

16  
17 **Fig. S1** Polarized micrographs of TP gelator before (A) and after (B) freeze-drying. Microscopic  
18 images were captured at 200× magnification.

19  
20 In order to analyze the structure of solid W/O emulsions during the preparation of TP gelator,  
21 the microstructure of samples before and after freeze-drying was observed with PLM, as shown in  
22 Fig. S1. Beeswax and TP aqueous solution were shear emulsified to form a W/O emulsion. The X-  
23 ray diffractogram signified the crystalline nature of beeswax, which was determined by its chemical  
24 composition. When removed from high temperature, beeswax could be rapidly cooled because of the  
25 long saturated fatty acid chains in the structure to ensure the size of the TP solution dispersed in it.  
26 From Fig. S1(A), it could be clearly observed that the dispersed TP droplets were wrapped in the  
27 network structure formed by beeswax crystallization. The beeswax crystals prevented the aggregation  
28 of TP droplets and ensured the stability of the emulsion. And the TP gelator after the removal of water  
29 by lyophilization from solid W/O emulsion was shown in Fig. S1(B).

30

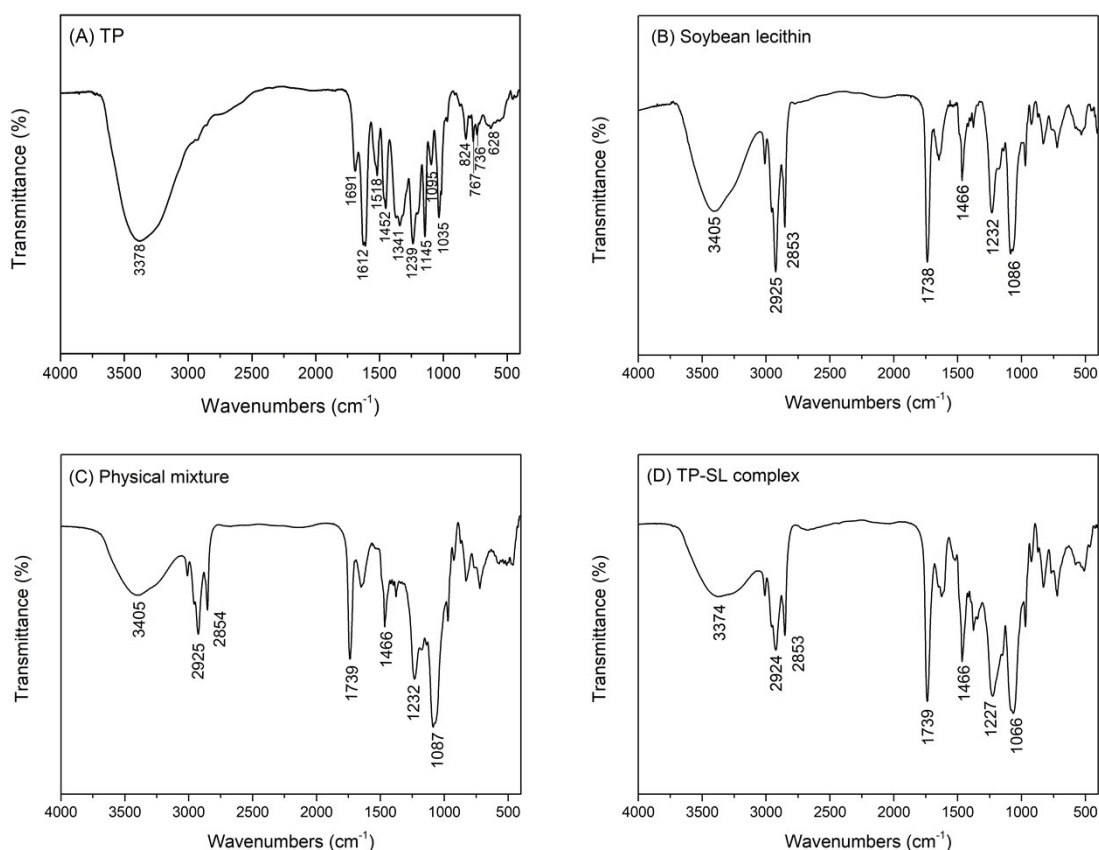

31

32 **Fig. S2** Fourier-transform infrared spectra of TP (A), Soybean lecithin (B), Physical mixture of TP  
 33 and soybean lecithin (C) and TP-SL complex (D), respectively.

34

35 TP-SL complex was prepared according to the method in Section 2.2, and beeswax was replaced  
 36 by deionized water. The characteristic absorption peaks of soybean lecithin appeared at 2925 and  
 37 2853  $\text{cm}^{-1}$  for C-H stretching of long fatty acid chain, 1738  $\text{cm}^{-1}$  for C=O stretching vibration of fatty  
 38 acid ester, 1232 and 1086  $\text{cm}^{-1}$  for P=O and P-O-C stretching <sup>1,2</sup>. The infrared spectrum of physical  
 39 mixture was only the superposition of TP and soybean lecithin. It was similar to the spectra of soybean  
 40 lecithin without peak shift, while the characteristic absorption peak of TP was not obvious due to the  
 41 small amount of addition. The TP-SL complex spectra showed that the peak corresponding to the  
 42 functional group N-H (3374  $\text{cm}^{-1}$ ) was shifted to lower wavenumber and the intensity decreased. In

43 addition, the absorption peaks corresponding to the P=O (1227 cm<sup>-1</sup>) and P-O-C (1066 cm<sup>-1</sup>)  
44 stretching was shifted to lower wavenumber by 5 cm<sup>-1</sup> and 20 cm<sup>-1</sup>, respectively. The shifting of peaks  
45 in TP-SL complex compared with soybean lecithin indicated that the presence of intermolecular  
46 interactions between the phenolic hydroxyl group in TP and the quaternary ammonium nitrogen in  
47 the choline portion of soybean lecithin <sup>3</sup>.

48

49 **Table S1** Composition of the Tea Polyphenols (HPLC).

| Peak | Compound                           | Content (%) |
|------|------------------------------------|-------------|
| 1    | catechin (C)                       | 32.01       |
| 2    | epigallocatechin-3- gallate (EGCG) | 28.80       |
| 3    | gallocatechin-3-gallate (GCG)      | 9.82        |
| 4    | epicatechin-3-gallate (ECG)        | 19.36       |

51 **Reference:**

- 52 1. D. Singh, M. S. M. Rawat, A. Semalty and M. Semalty, Chrysophanol-phospholipid complex  
53 A drug delivery strategy in herbal novel drug delivery system (HNDDS), *J Therm Anal*  
54 *Calorim.*, 2013, **111**, 2069-2077.
- 55 2. J. Li, P. Liu, J. P. Liu, J. K. Yang, W. L. Zhang, Y. Q. Fan, S. L. Kan, Y. Cui and W. J. Zhang,  
56 Bioavailability and foam cells permeability enhancement of Salvianolic Acid B pellets based  
57 on drug-phospholipids complex technique, *Eur J Pharm Biopharm.*, 2014, **86**, 562-562.
- 58 3. D. R. Telange, N. K. Sohail, A. T. Hemke, P. S. Kharkar and A. M. Pethe, Phospholipid  
59 complex-loaded self-assembled phytosomal soft nanoparticles: evidence of enhanced  
60 solubility, dissolution rate, ex vivo permeability, oral bioavailability, and antioxidant potential  
61 of mangiferin, *Drug Deliv Transl Re.*, 2020, DOI: 10.1007/s13346-020-00822-4.

62
